# Supplementary material for: DNA Barcodes Provide a Quick Preview of Mitochondrial Genome Composition
Source: PLoS One. 2007 Mar 28;2(3):e325. doi: 10.1371/journal.pone.0000325 (PMC1828616; doi:10.1371/journal.pone.0000325)
Supplement: Table S1 — The names of the species used in this study, along with the GenBank accession numbers of their mitochondrial genome sequences are provided in the Supplementary Table S1. (0.11 MB XLS) [file pone.0000325.s001.xls]

## Sheet: TableS1
Supplmentary Table S1. Completely sequenced mintochondrial genomes in Metazoa.
The DNA barcode sequences are located on the "+"-strands (the annotated strands in GenBank), except the three highlighted entries (NC_006386, NC_007438, NC_005335).
Accession No.	GI	Species	Phylum
NC_006892	62161267	Leptorhynchoides_thecatus	Acanthocephala
NC_006321	52696458	Clymenella_torquata	Annelida
NC_001673	5835191	Lumbricus_terrestris	Annelida
NC_007933	91176248	Orbinia_latreillii	Annelida
NC_000931	6137767	Platynereis_dumerilii	Annelida
NC_008141	108793378	Adoxophyes_honmai	Arthropoda
NC_006817	58372083	Aedes_albopictus	Arthropoda
NC_006160	51830142	Aleurochiton_aceris	Arthropoda
NC_005939	49146478	Aleurodicus_dugesii	Arthropoda
NC_005963	49619212	Amblyomma_triguttatum	Arthropoda
NC_008070	107736148	Anopheles_funestus	Arthropoda
NC_002084	5834911	Anopheles_gambiae	Arthropoda
NC_000875	5835918	Anopheles_quadrimaculatus A	Arthropoda
NC_008221	109689623	Anoplophora_glabripennis	Arthropoda
NC_004622	29126164	Antheraea_pernyi	Arthropoda
NC_001566	5834925	Apis_mellifera ligustica	Arthropoda
NC_005935	49147414	Argulus_americanus	Arthropoda
NC_005934	49147368	Armillifer_armillatus	Arthropoda
NC_001620	5835051	Artemia_franciscana	Arthropoda
NC_005333	41057423	Bactrocera_oleae	Arthropoda
NC_006279	52220940	Bemisia_tabaci	Arthropoda
NC_003395	18644896	Bombyx_mandarina	Arthropoda
NC_002355	8572562	Bombyx_mori	Arthropoda
NC_006281	52220926	Callinectes_sapidus	Arthropoda
NC_007884	89257204	Campanulotes_bidentatus compar	Arthropoda
NC_005291	39653748	Carios_capensis	Arthropoda
NC_006896	62161041	Centruroides_limpidus	Arthropoda
NC_000857	5835876	Ceratitis_capitata	Arthropoda
NC_011243	48427641	Cherax_destructor	Arthropoda
NC_002697	13435200	Chrysomya_putoria	Arthropoda
NC_002660	12711796	Cochliomyia_hominivorax	Arthropoda
NC_007976	94490710	Coreana_raphaelis	Arthropoda
NC_003372	18390112	Crioceris_duodecimpunctata	Arthropoda
NC_000844	5835848	Daphnia_pulex	Arthropoda
NC_006378	54306052	Dermatobia_hominis	Arthropoda
NC_005779	45332696	Drosophila_mauritiana	Arthropoda
NC_001709	5835233	Drosophila_melanogaster	Arthropoda
NC_005780	45332682	Drosophila_sechellia	Arthropoda
NC_005781	45332829	Drosophila_simulans	Arthropoda
NC_001322	5834829	Drosophila_yakuba	Arthropoda
NC_006992	63025112	Eriocheir_sinensis	Arthropoda
NC_007379	73912689	Geothelphusa_dehaani	Arthropoda
NC_005438	42632285	Gomphiocephalus_hodgsoni	Arthropoda
NC_007442	77020068	Gonodactylus_chiragra	Arthropoda
NC_006678	58045502	Gryllotalpa_orientalis	Arthropoda
NC_005942	49146937	Habronattus_oregonensis	Arthropoda
NC_005292	39653762	Haemaphysalis_flava	Arthropoda
NC_007102	67009990	Haematobia_irritans irritans	Arthropoda
NC_006916	62184522	Harpiosquilla_harpax	Arthropoda
NC_005924	49147290	Heptathela_hangzhouensis	Arthropoda
NC_002651	12383036	Heterodoxus_macropus	Arthropoda
NC_006899	62161309	Homalodisca_coagulata	Arthropoda
NC_005937	49146854	Hutchinsoniella_macracantha	Arthropoda
NC_002010	5835680	Ixodes_hexagonus	Arthropoda
NC_005293	39656300	Ixodes_holocyclus	Arthropoda
NC_004370	25057186	Ixodes_persulcatus	Arthropoda
NC_006078	50812145	Ixodes_uriae	Arthropoda
NC_007214	71647201	Japyx_solifugus	Arthropoda
NC_007215	71647022	Lepeophtheirus_salmonis	Arthropoda
NC_004816	31324905	lepidopsocid_RS-2001	Arthropoda
NC_007601	81230443	Leptotrombidium_akamushi	Arthropoda
NC_007600	81230429	Leptotrombidium_deliense	Arthropoda
NC_007177	70724941	Leptotrombidium_pallidum	Arthropoda
NC_003057	15150764	Limulus_polyphemus	Arthropoda
NC_002629	11863137	Lithobius_forficatus	Arthropoda
NC_001712	5835247	Locusta_migratoria	Arthropoda
NC_007443	77020123	Lysiosquillina_maculata	Arthropoda
NC_006880	61651658	Macrobrachium_rosenbergii	Arthropoda
NC_007010	66276044	Marsupenaeus_japonicus	Arthropoda
NC_006293	52221052	Megabalanus_volcano	Arthropoda
NC_004529	27733916	Melipona_bicolor	Arthropoda
NC_006515	81237616	Mesobuthus_gibbosus	Arthropoda
NC_003343	18138544	Narceus_annularus	Arthropoda
NC_006159	51830183	Neomaskellia_andropogonis	Arthropoda
NC_008063	107736179	Nephila_clavata	Arthropoda
NC_006895	62161388	Nesomachilis_australica	Arthropoda
NC_006074	50812315	Onychiurus_orientalis	Arthropoda
NC_005925	49146440	Ornithoctonus_huwena	Arthropoda
NC_004357	28263048	Ornithodoros_moubata	Arthropoda
NC_005820	45544564	Ornithodoros_porcinus	Arthropoda
NC_003368	18314304	Ostrinia_furnacalis	Arthropoda
NC_003367	18314290	Ostrinia_nubilalis	Arthropoda
NC_006157	51830063	Pachypsylla_venusta	Arthropoda
NC_003058	15150778	Pagurus_longicarpus	Arthropoda
NC_004251	23264062	Panulirus_japonicus	Arthropoda
NC_002184	7374113	Penaeus_monodon	Arthropoda
NC_006076	50812103	Periplaneta_fuliginosa	Arthropoda
NC_007688	84488608	Petrobius_brevistylis	Arthropoda
NC_005944	49146630	Philaenus_spumarius	Arthropoda
NC_006075	50812117	Podura_aquatica	Arthropoda
NC_005936	49146590	Pollicipes_polymerus	Arthropoda
NC_005037	32698659	Portunus_trituberculatus	Arthropoda
NC_006891	62161323	Pseudocarcinus_gigas	Arthropoda
NC_006133	51101192	Pteronarcys_princeps	Arthropoda
NC_003970	21326209	Pyrocoelia_rufa	Arthropoda
NC_002074	5835694	Rhipicephalus_sanguineus	Arthropoda
NC_006158	51830049	Schizaphis_graminum	Arthropoda
NC_007701	84488734	Sclerophasma_paresisensis	Arthropoda
NC_005870	47059779	Scutigera_coleoptrata	Arthropoda
NC_005938	49146902	Speleonectes_tulumensis	Arthropoda
NC_007444	77020054	Squilla_empusa	Arthropoda
NC_006081	50812329	Squilla_mantis	Arthropoda
NC_007702	84488776	Tamolanica_tamolana	Arthropoda
NC_008974	47777266	Tetraclita_japonica	Arthropoda
NC_006292	52221066	Tetraleurodes_acaciae	Arthropoda
NC_002735	13621145	Tetrodontophora_bielanensis	Arthropoda
NC_006080	50812159	Thermobia_domestica	Arthropoda
NC_004371	25057389	Thrips_imaginis	Arthropoda
NC_003344	18138530	Thyropygus_sp. DVL-2001	Arthropoda
NC_003979	21327728	Tigriopus_japonicus	Arthropoda
NC_006280	52220968	Trialeurodes_vaporariorum	Arthropoda
NC_002609	11182462	Triatoma_dimidiata	Arthropoda
NC_003081	15451728	Tribolium_castaneum	Arthropoda
NC_005437	42632243	Tricholepidion_gertschi	Arthropoda
NC_004465	27383535	Triops_cancriformis	Arthropoda
NC_006079	50812131	Triops_longicaudatus	Arthropoda
NC_005306	40458405	Vargula_hilgendorfii	Arthropoda
NC_004454	27311152	Varroa_destructor	Arthropoda
NC_002322	8404656	Laqueus_rubellus	Brachiopoda
NC_003086	15341649	Terebratalia_transversa	Brachiopoda
NC_000941	6691408	Terebratulina_retusa	Brachiopoda
NC_008192	109289922	Flustrellidra_hispida	Bryozoa
NC_006083	50812493	Paraspadella_gotoi	Chaetognatha
NC_006386	55338240	Spadella_cephaloptera	Chaetognatha
NC_005958	49616802	Abronia_graminea	Chordata
NC_006131	51101178	Acanthogobius_hasta	Chordata
NC_005212	38349475	Acinonyx_jubatus	Chordata
NC_005451	42632215	Acipenser_dabryanus	Chordata
NC_005795	45387959	Acipenser_stellatus	Chordata
NC_004743	30065662	Acipenser_transmontanus	Chordata
NC_007400	74310558	Acrochordus_granulatus	Chordata
NC_005800	45388057	Albula_glossodonta	Chordata
NC_005801	45388071	Aldrovandia_affinis	Chordata
NC_007227	71658022	Alectura_lathami	Chordata
NC_004590	28894766	Alepocephalus_tenebrosus	Chordata
NC_001922	5835540	Alligator_mississippiensis	Chordata
NC_004448	27228457	Alligator_sinensis	Chordata
NC_004398	25057728	Allocyttus_niger	Chordata
NC_006688	58045563	Alytes_obstetricans pertinax	Chordata
NC_006888	62161351	Ambystoma_andersoni	Chordata
NC_006890	62161196	Ambystoma_californiense	Chordata
NC_006889	62161365	Ambystoma_dumerilii	Chordata
NC_006330	53686292	Ambystoma_laterale	Chordata
NC_005797	45439383	Ambystoma_mexicanum	Chordata
NC_006887	62161229	Ambystoma_tigrinum tigrinum	Chordata
NC_004742	30065690	Amia_calva	Chordata
NC_006284	52221080	Amphisbaena_schmidti	Chordata
NC_004926	32453793	Andrias_davidianus	Chordata
NC_007446	77020096	Andrias_japonicus	Chordata
NC_006327	53686474	Aneides_flavipunctatus	Chordata
NC_006338	53686488	Aneides_hardii	Chordata
NC_006531	56692312	Anguilla_anguilla	Chordata
NC_006532	56692456	Anguilla_australis australis	Chordata
NC_006533	56692470	Anguilla_australis schmidtii	Chordata
NC_006543	56692554	Anguilla_bengalensis labiata	Chordata
NC_006534	56692399	Anguilla_bicolor bicolor	Chordata
NC_006535	56692413	Anguilla_bicolor pacifica	Chordata
NC_006537	56692354	Anguilla_celebesensis	Chordata
NC_006538	56692427	Anguilla_dieffenbachii	Chordata
NC_006539	56692526	Anguilla_interioris	Chordata
NC_002707	13540758	Anguilla_japonica	Chordata
NC_006536	56692540	Anguilla_malgumora	Chordata
NC_006540	56692340	Anguilla_marmorata	Chordata
NC_006541	56692484	Anguilla_megastoma	Chordata
NC_006542	56692368	Anguilla_mossambica	Chordata
NC_006544	56692512	Anguilla_nebulosa nebulosa	Chordata
NC_006545	56692498	Anguilla_obscura	Chordata
NC_006546	56692382	Anguilla_reinhardtii	Chordata
NC_006547	56692326	Anguilla_rostrata	Chordata
NC_008128	108793462	Anomalops_katoptron	Chordata
NC_002779	14141919	Anomalopteryx_didiformis	Chordata
NC_004391	25057258	Anoplogaster_cornuta	Chordata
NC_004539	27819328	Anser_albifrons	Chordata
NC_005933	49146194	Anseranas_semipalmata	Chordata
NC_003191	16357332	Antigonia_capros	Chordata
NC_004372	25057294	Aphredoderus_sayanus	Chordata
NC_004692	29570627	Apteronotus_albifrons	Chordata
NC_002782	46255316	Apteryx_haastii	Chordata
NC_008129	108793476	Aptocyclus_ventricosus	Chordata
NC_004413	25057942	Arcos_sp. KU-149	Chordata
NC_004023	21449916	Arctocephalus_forsteri	Chordata
NC_002812	14602407	Arctoscopus_japonicus	Chordata
NC_003712	21593906	Arenaria_interpres	Chordata
NC_002009	5835666	Artibeus_jamaicensis	Chordata
NC_008130	108793490	Aspasma_minima	Chordata
NC_006464	55979224	Asymmetron_lucayanum	Chordata
NC_003178	16357094	Ateleopus_japonicus	Chordata
NC_002674	13116540	Aulopus_japonicus	Chordata
NC_005313	40804706	Auxis_rochei	Chordata
NC_005318	40804692	Auxis_thazard	Chordata
NC_000877	5835932	Aythya_americana	Chordata
NC_005268	38707506	Balaena_mysticetus	Chordata
NC_005271	38707492	Balaenoptera_acutorostrata	Chordata
NC_006926	62184354	Balaenoptera_bonaerensis	Chordata
NC_006929	62184312	Balaenoptera_borealis	Chordata
NC_006928	62184480	Balaenoptera_brydei	Chordata
NC_007938	91176188	Balaenoptera_edeni	Chordata
NC_001601	5834995	Balaenoptera_musculus	Chordata
NC_007937	91176262	Balaenoptera_omurai	Chordata
NC_001321	5819095	Balaenoptera_physalus	Chordata
NC_004374	25057470	Bassozetus_zenkevitchi	Chordata
NC_008222	109689651	Bathygadus_antrodes	Chordata
NC_004591	28881955	Bathylagus_ochotensis	Chordata
NC_006340	53686516	Batrachoseps_attenuatus	Chordata
NC_006333	53686362	Batrachoseps_wrightorum	Chordata
NC_008091	108564757	Batrachuperus_gorganensis	Chordata
NC_008077	107991031	Batrachuperus_londongensis	Chordata
NC_008090	108937491	Batrachuperus_mustersi	Chordata
NC_008083	107991045	Batrachuperus_pinchonii	Chordata
NC_008085	108470166	Batrachuperus_tibetanus	Chordata
NC_005274	38707598	Berardius_bairdii	Chordata
NC_004393	25057313	Beryx_decadactylus	Chordata
NC_003188	16357037	Beryx_splendens	Chordata
NC_006287	52220954	Bipes_biporus	Chordata
NC_006288	52221108	Bipes_canaliculatus	Chordata
NC_006286	52221094	Bipes_tridactylus	Chordata
NC_007398	74310505	Boa_constrictor	Chordata
NC_006346	53686544	Bolitoglossa_n. sp. RLM-2004	Chordata
NC_006402	55583344	Bombina_bombina	Chordata
NC_006689	58045601	Bombina_orientalis	Chordata
NC_006380	55274615	Bos_grunniens	Chordata
NC_005971	50234066	Bos_indicus	Chordata
NC_006853	60101824	Bos_taurus	Chordata
NC_006923	62184298	Bradypus_tridactylus	Chordata
NC_004537	27802003	Branchiostoma_belcheri	Chordata
NC_000834	5881414	Branchiostoma_floridae	Chordata
NC_008069	107736827	Branchiostoma_japonicum	Chordata
NC_001912	5835512	Branchiostoma_lanceolatum	Chordata
NC_007011	66276016	Branta_canadensis	Chordata
NC_008124	108793434	Bregmaceros_nectabanus	Chordata
NC_006295	52220982	Bubalus_bubalis	Chordata
NC_008975	47777251	Buergeria_buergeri	Chordata
NC_005794	45388001	Bufo_melanostictus	Chordata
NC_003128	16306596	Buteo_buteo	Chordata
NC_003169	16357248	Caelorinchus_kishinouyei	Chordata
NC_005828	45685994	Caenolestes_fuliginosus	Chordata
NC_002744	14190593	Caiman_crocodilus	Chordata
NC_008102	108767310	Campostoma_anomalum	Chordata
NC_002008	17737322	Canis_familiaris	Chordata
NC_008093	108561416	Canis_latrans	Chordata
NC_008092	108561299	Canis_lupus	Chordata
NC_005269	38707520	Caperea_marginata	Chordata
NC_005044	33285125	Capra_hircus	Chordata
NC_004405	25057815	Carangoides_armatus	Chordata
NC_004406	25057829	Caranx_melampygus	Chordata
NC_004373	25057452	Carapus_bermudensis	Chordata
NC_002079	5835778	Carassius_auratus	Chordata
NC_006580	56912167	Carassius_auratus auratus	Chordata
NC_006136	51235004	Carassius_auratus x Cyprinus carpio	Chordata
NC_006387	55338278	Carassius_auratus x Cyprinus carpio x Carassius cuvieri	Chordata
NC_006291	52221010	Carassius_carassius	Chordata
NC_005257	38638389	Carpiodes_carpio	Chordata
NC_002778	48864618	Casuarius_casuarius	Chordata
NC_004375	25057485	Cataetyx_rubrirostris	Chordata
NC_007628	83309057	Cathartes_aura	Chordata
NC_004383	25057580	Caulophryne_pelagica	Chordata
NC_000884	5835988	Cavia_porcellus	Chordata
NC_002763	14010679	Cebus_albifrons	Chordata
NC_001808	5835401	Ceratotherium_simum	Chordata
NC_007009	66276030	Cercopithecus_aethiops	Chordata
NC_008066	107736076	Cercopithecus_sabaeus	Chordata
NC_007704	84488580	Cervus_elaphus	Chordata
NC_006993	63025126	Cervus_nippon centralis	Chordata
NC_007179	68989228	Cervus_nippon yakushimae	Chordata
NC_006973	62736193	Cervus_nippon yesoensis	Chordata
NC_004389	25057276	Cetostoma_regani	Chordata
NC_004700	29570669	Chalceus_macrolepidotus	Chordata
NC_002626	11610804	Chalinolobus_tuberculatus	Chordata
NC_004693	29570613	Chanos_chanos	Chordata
NC_003159	16356981	Chauliodus_sloani	Chordata
NC_004381	25057541	Chaunax_abei	Chordata
NC_004382	25057558	Chaunax_tosaensis	Chordata
NC_000886	5836002	Chelonia_mydas	Chordata
NC_003136	16117424	Chimaera_monstrosa	Chordata
NC_006082	50659181	Chinemys_reevesi	Chordata
NC_006913	62184424	Chirocentrus_dorab	Chordata
NC_003160	16357122	Chlorophthalmus_agassizi	Chordata
NC_006355	53793980	Chlorurus_sordidus	Chordata
NC_006924	62184340	Choloepus_didactylus	Chordata
NC_008108	108767352	Chondrostoma_lemmingii	Chordata
NC_002073	5902189	Chrysemys_picta	Chordata
NC_004920	32402539	Chrysochloris_asiatica	Chordata
NC_002196	7555761	Ciconia_boyciana	Chordata
NC_002197	7549724	Ciconia_ciconia	Chordata
NC_004447	48860548	Ciona_intestinalis	Chordata
NC_004570	28436198	Ciona_savignyi	Chordata
NC_007975	94490693	Cnemotriccus_fuscatus	Chordata
NC_007229	71658036	Cobitis_sinensis	Chordata
NC_004695	29570711	Cobitis_striata	Chordata
NC_006901	62161140	Colobus_guereza	Chordata
NC_003183	16357079	Cololabis_saira	Chordata
NC_002761	14010651	Conger_myriaster	Chordata
NC_005962	49616788	Cordylus_warreni	Chordata
NC_002646	12248136	Coregonus_lavaretus	Chordata
NC_007783	86990417	Coreoleuciscus_splendidus	Chordata
NC_002069	5835722	Corvus_frugilegus	Chordata
NC_004698	29570739	Corydoras_rabauti	Chordata
NC_004404	25057361	Cottus_reinii	Chordata
NC_004575	28603653	Coturnix_chinensis	Chordata
NC_003408	18767647	Coturnix_japonica	Chordata
NC_003170	16357416	Crenimugil_crenilabis	Chordata
NC_007936	91176202	Cricetulus_griseus	Chordata
NC_006893	62161165	Crocidura_russula	Chordata
NC_008142	108802828	Crocodylus_niloticus	Chordata
NC_008143	108802842	Crocodylus_porosus	Chordata
NC_007881	89257246	Cromeria_nilotica	Chordata
NC_001727	5835275	Crossostoma_lacustre	Chordata
NC_007691	84488706	Cygnus_columbianus	Chordata
NC_007401	74310586	Cylindrophis_ruffus	Chordata
NC_004031	21449889	Cynocephalus_variegatus	Chordata
NC_008103	108767240	Cyprinella_spiloptera	Chordata
NC_001606	5835023	Cyprinus_carpio	Chordata
NC_007403	74325201	Cypselurus_hiraii	Chordata
NC_008134	108793294	Dactylopsila_trivirgata	Chordata
NC_003194	16357360	Dactyloptena_peterseni	Chordata
NC_004402	25057787	Dactyloptena_tiltoni	Chordata
NC_004592	28881941	Dallia_pectoralis	Chordata
NC_003185	16357304	Danacetichthys_galathenus	Chordata
NC_002333	15079186	Danio_rerio	Chordata
NC_001821	5835429	Dasypus_novemcinctus	Chordata
NC_007630	83309015	Dasyurus_hallucatus	Chordata
NC_007889	89257260	Denticeps_clupeoides	Chordata
NC_006339	53686320	Desmognathus_fuscus	Chordata
NC_006337	53686334	Desmognathus_wrighti	Chordata
NC_003164	16357192	Diaphus_splendidus	Chordata
NC_001610	5835037	Didelphis_virginiana	Chordata
NC_001945	5835568	Dinodon_semicarinatus	Chordata
NC_002672	13116556	Dinornis_giganteus	Chordata
NC_007172	68989160	Diomedea_melanophris	Chordata
NC_004376	25057499	Diplacanthopoma_brachysoma	Chordata
NC_006283	52220996	Diplometopon_zarudnyi	Chordata
NC_002647	12248164	Diplophos_taenia	Chordata
NC_008126	108793448	Diretmoides_veriginae	Chordata
NC_008127	108793392	Diretmus_argenteus	Chordata
NC_006690	58047406	Discoglossus_galganoi	Chordata
NC_008145	108793280	Distoechurus_pennatus	Chordata
NC_002780	14141995	Dogania_subplana	Chordata
NC_006627	57642242	Doliolum_nationalis	Chordata
NC_008107	108773017	Dorosoma_cepedianum	Chordata
NC_002784	14141877	Dromaius_novaehollandiae	Chordata
NC_005826	45685691	Dromiciops_gliroides	Chordata
NC_003314	17981678	Dugong_dugon	Chordata
NC_002631	34582602	Echinops_telfairi	Chordata
NC_002808	14530815	Echinosorex_gymnura	Chordata
NC_007632	83309085	Echymipera_rufescens australis	Chordata
NC_004701	29570641	Eigenmannia_sp.	Chordata
NC_003175	16357009	Elassoma_evergladei	Chordata
NC_004415	25057242	Eleotris_acanthopoma	Chordata
NC_004921	32402553	Elephantulus_sp. VB001	Chordata
NC_005129	107122072	Elephas_maximus	Chordata
NC_005798	45439397	Elops_hawaiensis	Chordata
NC_005803	45387973	Elops_saurus	Chordata
NC_002673	13116573	Emeus_crassus	Chordata
NC_004407	25057845	Emmelichthys_struhsakeri	Chordata
NC_004410	25057905	Enedrias_crassispina	Chordata
NC_003097	15451803	Engraulis_japonicus	Chordata
NC_006328	53686376	Ensatina_eschscholtzii	Chordata
NC_006465	55979238	Epigonichthys_maldivensis	Chordata
NC_003040	15079203	Episoriculus_fumidus	Chordata
NC_002807	14530801	Eptatretus_burgeri	Chordata
NC_001788	5835345	Equus_asinus	Chordata
NC_001640	5835107	Equus_caballus	Chordata
NC_002080	5835792	Erinaceus_europaeus	Chordata
NC_005251	38639882	Erpetoichthys_calabaricus	Chordata
NC_005270	38707478	Eschrichtius_robustus	Chordata
NC_004593	28881913	Esox_lucius	Chordata
NC_005254	48857109	Etheostoma_radiosum	Chordata
NC_006930	62184410	Eubalaena_australis	Chordata
NC_006931	62184536	Eubalaena_japonica	Chordata
NC_002772	46358645	Eudromia_elegans	Chordata
NC_008138	108793350	Eudyptes_chrysocome	Chordata
NC_004538	27819314	Eudyptula_minor	Chordata
NC_000888	5836016	Eumeces_egregius	Chordata
NC_004030	34577124	Eumetopias_jubatus	Chordata
NC_006329	53686418	Eurycea_bislineata	Chordata
NC_005299	39980683	Eurypharynx_pelecanoides	Chordata
NC_004390	25057616	Eutaeniophorus_sp. 033-Miya	Chordata
NC_004530	27733887	Euthynnus_alletteratus	Chordata
NC_003184	16357262	Exocoetus_volitans	Chordata
NC_000878	5835946	Falco_peregrinus	Chordata
NC_005055	33438943	Fejervarya_limnocharis	Chordata
NC_001700	5835205	Felis_catus	Chordata
NC_002081	5835806	Gadus_morhua	Chordata
NC_004594	28881927	Galaxias_maculatus	Chordata
NC_008156	109156429	Galemys_pyrenaicus	Chordata
NC_001323	5834843	Gallus_gallus	Chordata
NC_007237	71658064	Gallus_gallus bankiva	Chordata
NC_007236	71658078	Gallus_gallus gallus	Chordata
NC_007235	71658050	Gallus_gallus spadiceus	Chordata
NC_007239	71657952	Gallus_lafayettei	Chordata
NC_007240	71657970	Gallus_sonneratii	Chordata
NC_007238	71657993	Gallus_varius	Chordata
NC_004388	25057172	Gambusia_affinis	Chordata
NC_003174	16356995	Gasterosteus_aculeatus	Chordata
NC_008139	108793364	Gavia_pacifica	Chordata
NC_007007	66276072	Gavia_stellata	Chordata
NC_006301	52429792	Gegeneophis_ramaswamii	Chordata
NC_007627	83309043	Gekko_gecko	Chordata
NC_006285	52221024	Geocalamus_acutus	Chordata
NC_007694	84488622	Geochelone_pardalis	Chordata
NC_008105	108767324	Gila_robusta	Chordata
NC_004595	28881969	Glossanodon_semifasciatus	Chordata
NC_004702	29570753	Gonorynchus_greyi	Chordata
NC_002574	10803738	Gonostoma_gracile	Chordata
NC_001645	5835149	Gorilla_gorilla	Chordata
NC_007890	89257274	Grasseichthys_gabonensis	Chordata
NC_004417	25057375	Gymnothorax_kidako	Chordata
NC_006341	53686432	Gyrinophilus_porphyriticus	Chordata
NC_003713	27881475	Haematopus_ater	Chordata
NC_001602	5835009	Halichoerus_grypus	Chordata
NC_002177	7335690	Halocynthia_roretzi	Chordata
NC_003161	16357136	Harpadon_microchir	Chordata
NC_003195	16357374	Helicolenus_hilgendorfi	Chordata
NC_007785	86990361	Hemibarbus_labeo	Chordata
NC_007784	86990403	Hemibarbus_longirostris	Chordata
NC_007786	86990389	Hemibarbus_mylodon	Chordata
NC_006342	53686586	Hemidactylium_scutatum	Chordata
NC_005033	32526842	Hemiechinus_auritus	Chordata
NC_006835	58578650	Herpestes_javanicus	Chordata
NC_003137	16117410	Heterodontus_francisci	Chordata
NC_007230	71658106	Hexatrygon_bickelli	Chordata
NC_005145	38018032	Hiodon_alosoides	Chordata
NC_000889	5836030	Hippopotamus_amphibius	Chordata
AC_000021	58615662	Homo_sapiens	Chordata
NC_001807	17981852	Homo_sapiens	Chordata
NC_003187	16357318	Hoplostethus_japonicus	Chordata
NC_005252	38638375	Huso_huso	Chordata
NC_006345	53686390	Hydromantes_brunus	Chordata
NC_006403	55583426	Hyla_chinensis	Chordata
NC_002082	5835820	Hylobates_lar	Chordata
NC_008076	107991073	Hynobius_amjiensis	Chordata
NC_008088	108561799	Hynobius_chinensis	Chordata
NC_008084	107991101	Hynobius_formosanus	Chordata
NC_008079	107991017	Hynobius_leechii	Chordata
NC_005273	38707612	Hyperoodon_ampullatus	Chordata
NC_004386	25057347	Hypoatherina_tsurugae	Chordata
NC_004400	25057405	Hypoptychus_dybowskii	Chordata
NC_006404	55583358	Ichthyophis_bannanicus	Chordata
NC_006302	52429791	Ichthyophis_glutinosus	Chordata
NC_003489	19807654	Ictalurus_punctatus	Chordata
NC_002793	14193045	Iguana_iguana	Chordata
NC_003179	16357108	Ijimaia_dofleini	Chordata
NC_004401	25057767	Indostomus_paradoxus	Chordata
NC_007695	84488636	Indotestudo_elongata	Chordata
NC_007696	84488748	Indotestudo_forstenii	Chordata
NC_005276	38707450	Inia_geoffrensis	Chordata
NC_002746	13786588	Isoodon_macrourus	Chordata
NC_005314	40805123	Jaculus_jaculus	Chordata
NC_006917	62184438	Jenkinsia_lamprotaenia	Chordata
NC_006405	55583440	Kaloula_pulchra	Chordata
NC_005316	40804664	Katsuwonus_pelamis	Chordata
NC_007882	89257288	Kneria_sp. SL-2004	Chordata
NC_005272	38707548	Kogia_breviceps	Chordata
NC_003290	17488489	Kryptolebias_marmoratus	Chordata
NC_005278	38707534	Lagenorhynchus_albirostris	Chordata
NC_008136	108793336	Lagorchestes_hirsutus	Chordata
NC_002504	9755345	Lama_pacos	Chordata
NC_001131	6691422	Lampetra_fluviatilis	Chordata
NC_003165	16357023	Lampris_guttatus	Chordata
NC_007006	66276058	Larus_dominicanus	Chordata
NC_007439	77020012	Lates_calcarifer	Chordata
NC_001804	5835373	Latimeria_chalumnae	Chordata
NC_006921	62184396	Latimeria_menadoensis	Chordata
NC_004696	29570725	Lefua_echigonia	Chordata
NC_004025	21449875	Lemur_catta	Chordata
NC_003342	18138243	Lepidosiren_paradoxa	Chordata
NC_004744	30065676	Lepisosteus_oculatus	Chordata
NC_008104	108767296	Lepisosteus_osseus	Chordata
NC_008131	108793238	Lepisosteus_spatula	Chordata
NC_005961	49616774	Leptotyphlops_dulcis	Chordata
NC_004028	21492444	Lepus_europaeus	Chordata
NC_007440	77020082	Limnonectes_fujianensis	Chordata
NC_007629	83309071	Lipotes_vexillifer	Chordata
NC_008078	107991059	Liua_shihi	Chordata
NC_004380	25057142	Lophius_americanus	Chordata
NC_008125	108793252	Lophius_litulon	Chordata
NC_004379	25057214	Lota_lota	Chordata
NC_000934	6137801	Loxodonta_africana	Chordata
NC_002756	13936179	Lyciasalamandra_atifi	Chordata
NC_004409	25057885	Lycodes_toyamensis	Chordata
NC_005943	49146236	Macaca_mulatta	Chordata
NC_002764	14010693	Macaca_sylvanus	Chordata
NC_001794	5835359	Macropus_robustus	Chordata
NC_004026	21449903	Macroscelides_proboscideus	Chordata
NC_006520	56548761	Macrotis_lagotis	Chordata
NC_007700	84488790	Malacochersus_tornieri	Chordata
NC_007596	81230401	Mammuthus_primigenius	Chordata
NC_004027	21449973	Manis_tetradactyla	Chordata
NC_007693	84488762	Manouria_emys	Chordata
NC_007888	89255435	Mantella_madagascariensis	Chordata
NC_003193	16357346	Mastacembelus_favus	Chordata
NC_005837	46238024	Masturus_lanceolatus	Chordata
NC_005804	45387987	Megalops_atlanticus	Chordata
NC_005799	45388015	Megalops_cyprinoides	Chordata
NC_006927	62184326	Megaptera_novaeangliae	Chordata
NC_004384	25057600	Melanocetus_murrayi	Chordata
NC_007396	74310491	Melanogrammus_aeglefinus	Chordata
NC_004378	25057527	Melanonus_zugmayeri	Chordata
NC_004385	25057331	Melanotaenia_lacustris	Chordata
NC_007883	89255421	Menura_novaehollandiae	Chordata
NC_007395	74315077	Merlangius_merlangus	Chordata
NC_006516	56548733	Metachirus_nudicaudatus	Chordata
NC_006406	55583398	Microhyla_heymonsi	Chordata
NC_008106	108767268	Micropterus_salmoides	Chordata
NC_003041	15079217	Microtus_kikuchii	Chordata
NC_008064	107736027	Microtus_rossiaemeridionalis	Chordata
NC_008113	108767366	Minytrema_melanops	Chordata
NC_005035	32526814	Mogera_wogura	Chordata
NC_005836	46237732	Mola_mola	Chordata
NC_004392	25057635	Monocentris_japonicus	Chordata
NC_006299	52547305	Monodelphis_domestica	Chordata
NC_005279	38707570	Monodon_monoceros	Chordata
NC_003192	16356925	Monopterus_albus	Chordata
NC_003182	16356953	Mugil_cephalus	Chordata
NC_004577	28867217	Muntiacus_crinifrons	Chordata
NC_004563	28301754	Muntiacus_muntjak	Chordata
NC_004069	21908045	Muntiacus_reevesi	Chordata
NC_005089	34538597	Mus_musculus	Chordata
NC_006914	62198713	Mus_musculus domesticus	Chordata
NC_006915	62184368	Mus_musculus molossinus	Chordata
NC_000890	5836044	Mustelus_manazo	Chordata
NC_003163	16357178	Myctophum_affine	Chordata
NC_001892	5835484	Myoxus_glis	Chordata
NC_003189	16356939	Myripristis_berndti	Chordata
NC_006925	62184382	Mystacina_tuberculata	Chordata
NC_002639	12084808	Myxine_glutinosa	Chordata
NC_006401	55583384	Myxocyprinus_asiaticus	Chordata
NC_005315	40805109	Nannospalax_ehrenbergi	Chordata
NC_004596	28881983	Nansenia_ardesiaca	Chordata
NC_008216	109689539	Nasalis_larvatus	Chordata
NC_003127	15987260	Neoceratodus_forsteri	Chordata
NC_004399	25057747	Neocyttus_rhomboidalis	Chordata
NC_003180	16357164	Neoscopelus_microchir	Chordata
NC_005932	49146676	Ninox_novaeseelandiae	Chordata
NC_008132	108793406	Nipponia_nippon	Chordata
NC_005144	38018063	Notacanthus_chemnitzi	Chordata
NC_006522	56548691	Notoryctes_typhlops	Chordata
NC_008110	108767282	Notropis_stramineus	Chordata
NC_006382	54310668	Numida_meleagris	Chordata
NC_002765	14010665	Nycticebus_coucang	Chordata
NC_003033	15055558	Ochotona_collaris	Chordata
NC_005358	41353095	Ochotona_princeps	Chordata
NC_004029	34577125	Odobenus_rosmarus rosmarus	Chordata
NC_006326	53686404	Oedipina_poelzi	Chordata
NC_006897	62161280	Oncorhynchus_clarkii henshawi	Chordata
NC_001717	5835261	Oncorhynchus_mykiss	Chordata
NC_002980	14647165	Oncorhynchus_tshawytscha	Chordata
NC_008089	108561537	Onychodactylus_fischeri	Chordata
NC_005802	45388043	Ophisurus_macrorhynchos	Chordata
NC_004600	28894794	Opisthoproctus_soleatus	Chordata
NC_007231	71657938	Oreochromis_mossambicus	Chordata
NC_000891	5836058	Ornithorhynchus_anatinus	Chordata
NC_002078	5835764	Orycteropus_afer	Chordata
NC_001913	5835526	Oryctolagus_cuniculus	Chordata
NC_004387	25057156	Oryzias_latipes	Chordata
NC_003095	15451817	Osteoglossum_bicirrhosum	Chordata
NC_004394	25057655	Ostichthys_japonicus	Chordata
NC_001941	5835554	Ovis_aries	Chordata
NC_007397	74487323	Ovophis_okinavensis	Chordata
NC_008080	107991129	Pachyhynobius_shangchengensis	Chordata
NC_005146	38018046	Pagrus_auriga	Chordata
NC_003196	16357430	Pagrus_major	Chordata
NC_001644	5835135	Pan_paniscus	Chordata
NC_001643	5835121	Pan_troglodytes	Chordata
NC_006381	54310694	Pangasianodon_gigas	Chordata
NC_007441	77020040	Pantholops_hodgsonii	Chordata
NC_003096	15451789	Pantodon_buchholzi	Chordata
NC_001992	5835638	Papio_hamadryas	Chordata
NC_007891	89257302	Parakneria_cameronensis	Chordata
NC_002386	7212458	Paralichthys_olivaceus	Chordata
NC_006407	55583412	Paramesotriton_hongkongensis	Chordata
NC_004396	25057694	Parazen_pacificus	Chordata
NC_008144	108793322	Pelobates_cultripes	Chordata
NC_006132	51038583	Pelodiscus_sinensis	Chordata
NC_001947	5835582	Pelomedusa_subrufa	Chordata
NC_006521	56548705	Perameles_gunnii	Chordata
NC_008111	108767380	Percina_macrolepida	Chordata
NC_003168	16357234	Percopsis_transmontana	Chordata
NC_008135	108793266	Petaurus_breviceps	Chordata
NC_001626	5835065	Petromyzon_marinus	Chordata
NC_004411	25057200	Petroscirtes_breviceps	Chordata
NC_006344	53686348	Phaeognathus_hubrichti	Chordata
NC_007979	94490679	Phaethon_rubricauda	Chordata
NC_008137	108793518	Phalanger_interpositus	Chordata
NC_006523	56548775	Phascogale_tapoatafa	Chordata
NC_008133	108793308	Phascolarctos_cinereus	Chordata
NC_008112	108767338	Phenacobius_mirabilis	Chordata
NC_004699	29570655	Phenacogrammus_interruptus	Chordata
NC_001325	5834857	Phoca_vitulina	Chordata
NC_005280	38707464	Phocoena_phocoena	Chordata
NC_007892	89257218	Phractolaemus_ansorgii	Chordata
NC_002503	34582601	Physeter_catodon	Chordata
NC_004377	25057513	Physiculus_japonicus	Chordata
NC_005436	42632257	Pipistrellus_abramus	Chordata
NC_005275	38707626	Platanista_minor	Chordata
NC_003176	16357388	Platichthys_bicoloratus	Chordata
NC_007970	93007394	Platysternon_megacephalum	Chordata
NC_004597	28881997	Platytroctes_apus	Chordata
NC_002734	13560353	Plecoglossus_altivelis	Chordata
NC_006343	53686460	Plethodon_cinereus	Chordata
NC_006335	53686306	Plethodon_elongatus	Chordata
NC_006334	53686502	Plethodon_petraeus	Chordata
NC_008140	108793504	Podiceps_cristatus	Chordata
NC_006922	62184508	Pogona_vitticeps	Chordata
NC_002648	12248150	Polymixia_japonica	Chordata
NC_003181	16357220	Polymixia_lowei	Chordata
NC_004419	25057128	Polyodon_spathula	Chordata
NC_006408	55583372	Polypedates_megacephalus	Chordata
NC_001778	5835317	Polypterus_ornatipinnis	Chordata
NC_004418	25057420	Polypterus_senegalus senegalus	Chordata
NC_001646	5835163	Pongo_pygmaeus	Chordata
NC_002083	5835834	Pongo_pygmaeus abelii	Chordata
NC_005277	38707584	Pontoporia_blainvillei	Chordata
NC_006920	62184494	Porichthys_myriaster	Chordata
NC_003172	16357290	Poromitra_oscitans	Chordata
NC_006524	56548663	Potorous_tridactylus	Chordata
NC_008217	109689581	Presbytis_melalophos	Chordata
NC_004919	32402525	Procavia_capensis	Chordata
NC_008219	109689609	Procolobus_badius	Chordata
NC_001708	5835219	Protopterus_dolloi	Chordata
NC_005834	46135658	Psephurus_gladius	Chordata
NC_004697	29570683	Pseudobagrus_tokiensis	Chordata
NC_006519	56548677	Pseudocheirus_peregrinus	Chordata
NC_008081	107991087	Pseudohynobius_tsinpaensis	Chordata
NC_006332	53686446	Pseudotriton_ruber	Chordata
NC_004408	25057865	Pterocaesio_tile	Chordata
NC_002783	30387848	Pterocnemia_pennata	Chordata
NC_007174	68989146	Pterodroma_brevirostris	Chordata
NC_002612	11386118	Pteropus_dasymallus	Chordata
NC_002619	11602891	Pteropus_scapulatus	Chordata
NC_005796	45439411	Pterothrissus_gissu	Chordata
NC_008220	109689553	Pygathrix_nemaeus	Chordata
NC_008218	109689567	Pygathrix_roxellana	Chordata
NC_007399	74310572	Python_regius	Chordata
NC_007173	68989202	Raja_porosa	Chordata
NC_000893	5836072	Raja_radiata	Chordata
NC_002805	14389433	Rana_nigromaculata	Chordata
NC_007703	84488594	Rangifer_tarandus	Chordata
NC_004021	21450026	Ranodon_sibiricus	Chordata
NC_007887	89257232	Ranzania_laevis	Chordata
AC_000022	58615676	Rattus_norvegicus	Chordata
NC_001665	5835177	Rattus_norvegicus	Chordata
NC_004598	28894780	Retropinna_retropinna	Chordata
NC_007178	68989188	Rhacophorus_schlegelii	Chordata
NC_000846	5835498	Rhea_americana	Chordata
NC_006303	52429790	Rhinatrema_bivittatum	Chordata
NC_006282	52221038	Rhineura_floridana	Chordata
NC_001779	5835331	Rhinoceros_unicornis	Chordata
NC_005433	42717961	Rhinolophus_monoceros	Chordata
NC_005434	42632271	Rhinolophus_pumilus	Chordata
NC_007885	89257316	Rhodeus_uyekii	Chordata
NC_004414	25057228	Rhyacichthys_aspro	Chordata
NC_006331	53686572	Rhyacotriton_variegatus	Chordata
NC_005829	45685677	Rhyncholestes_raphanurus	Chordata
NC_003186	16357051	Rondeletia_loricata	Chordata
NC_007393	74310519	Rousettus_aegyptiacus	Chordata
NC_005298	39841620	Saccopharynx_lavenbergi	Chordata
NC_008082	107991115	Salamandrella_keyserlingii	Chordata
NC_004599	28894752	Salangichthys_microdon	Chordata
NC_006918	62184452	Salanx_ariakensis	Chordata
NC_004412	25057924	Salarias_fasciatus	Chordata
NC_001960	5835624	Salmo_salar	Chordata
NC_000861	5835904	Salvelinus_alpinus	Chordata
NC_000860	5835890	Salvelinus_fontinalis	Chordata
NC_004694	29570697	Sarcocheilichthys_variegatus microoculus	Chordata
NC_002616	11545708	Sardinops_melanostictus	Chordata
NC_004395	25057673	Sargocentron_rubrum	Chordata
NC_004403	25057801	Satyrichthys_amiscus	Chordata
NC_003162	16357150	Saurida_undosquamis	Chordata
NC_004420	25057438	Scaphirhynchus_cf. albus	Chordata
NC_005960	49616746	Sceloporus_occidentalis	Chordata
NC_002369	8573078	Sciurus_vulgaris	Chordata
NC_007012	66276086	Scleropages_formosus	Chordata
NC_006304	52429793	Scolecomorphus_vittatus	Chordata
NC_006398	55376093	Scomber_scombrus	Chordata
NC_008109	108767254	Scomberomorus_cavalla	Chordata
NC_003171	16357276	Scopelogadus_mizolepis	Chordata
NC_001950	5835596	Scyliorhinus_canicula	Chordata
NC_005450	42632187	Sebastes_schlegeli	Chordata
NC_008215	109689595	Semnopithecus_entellus	Chordata
NC_005959	49616760	Shinisaurus_crocodilurus	Chordata
NC_007911	89953460	Siphonops_annulatus	Chordata
NC_008123	108793420	Sirembo_imberbis	Chordata
NC_007631	83309029	Sminthopsis_crassicaudata	Chordata
NC_006517	56548747	Sminthopsis_douglasi	Chordata
NC_000879	5835960	Smithornis_sharpei	Chordata
NC_005435	42632229	Sorex_unguiculatus	Chordata
NC_004815	31324892	Sphenodon_punctatus	Chordata
NC_007599	81230457	Spizaetus_alboniger	Chordata
NC_007598	81230415	Spizaetus_nipalensis	Chordata
NC_008223	109689665	Squalogadus_modificatus	Chordata
NC_002012	5835708	Squalus_acanthias	Chordata
NC_003177	16357402	Stephanolepis_cirrhifer	Chordata
NC_006325	53686558	Stereochilus_marginatus	Chordata
NC_005931	49146712	Strigops_habroptilus	Chordata
NC_002785	14141905	Struthio_camelus	Chordata
NC_004416	25057960	Sufflamen_fraenatus	Chordata
NC_006919	62184466	Sundasalanx_mekongensis	Chordata
NC_000845	5835862	Sus_scrofa	Chordata
NC_005805	45388029	Synaphobranchus_kaupii	Chordata
NC_007228	71658092	Synodus_variegatus	Chordata
NC_007978	94490651	Synthliboramphus_antiquus	Chordata
NC_003321	18077882	Tachyglossus_aculeatus	Chordata
NC_007897	89274114	Taeniopygia_guttata	Chordata
NC_004299	23397366	Takifugu_rubripes	Chordata
NC_002391	7212513	Talpa_europaea	Chordata
NC_004032	21449946	Tamandua_tetradactyla	Chordata
NC_006518	56548719	Tarsipes_rostratus	Chordata
NC_002811	14602225	Tarsius_bancanus	Chordata
NC_007008	66276100	Teratoscincus_keyserlingii	Chordata
NC_007692	84488650	Testudo_graeca	Chordata
NC_007697	84488664	Testudo_horsfieldii	Chordata
NC_007699	84488678	Testudo_kleinmanni	Chordata
NC_007698	84488692	Testudo_marginata	Chordata
NC_007176	68989174	Tetraodon_nigroviridis	Chordata
NC_004449	27228478	Theragra_chalcogramma	Chordata
NC_006336	53686530	Thorius_n. sp. RLM-2004	Chordata
NC_002658	12667705	Thryonomys_swinderianus	Chordata
NC_005317	40804678	Thunnus_alalunga	Chordata
NC_004901	34577043	Thunnus_thynnus thynnus	Chordata
NC_005825	45685705	Thylamys_elegans	Chordata
NC_002781	46326805	Tinamus_major	Chordata
NC_003166	16357444	Trachipterus_trachypterus	Chordata
NC_002813	14602385	Trachurus_japonicus	Chordata
NC_006818	58372097	Trachurus_trachurus	Chordata
NC_006900	62161253	Trachypithecus_obscurus	Chordata
NC_008224	109689637	Trachyrincus_murrayi	Chordata
NC_003039	15079189	Trichosurus_vulpecula	Chordata
NC_002521	9997000	Tupaia_belangeri	Chordata
NC_002471	8844983	Typhlonectes_natans	Chordata
NC_006305	52429794	Uraeotyphlus_cf. oxyurus MW-212	Chordata
NC_005034	32526828	Urotrichus_talpoides	Chordata
NC_003426	19343488	Ursus_americanus	Chordata
NC_003427	19343502	Ursus_arctos	Chordata
NC_003428	19343516	Ursus_maritimus	Chordata
NC_008225	109689679	Ventrifossa_garmani	Chordata
NC_007939	91176216	Verasper_variegatus	Chordata
NC_000880	5835974	Vidua_chalybeata	Chordata
NC_003322	18077896	Vombatus_ursinus	Chordata
NC_008065	107736788	Xenagama_taylori	Chordata
NC_007402	74310600	Xenopeltis_unicolor	Chordata
NC_001573	5834981	Xenopus_laevis	Chordata
NC_006839	58618664	Xenopus_tropicalis	Chordata
NC_006364	54112085	Zaglossus_bruijni	Chordata
NC_004397	25057714	Zenion_japonicum	Chordata
NC_003173	16357065	Zenopsis_nebulosus	Chordata
NC_003190	16356967	Zeus_faber	Chordata
NC_003167	16357206	Zu_cristatus	Chordata
NC_003522	20065783	Acropora_tenuis	Cnidaria
NC_008160	109156500	Agaricia_humilis	Cnidaria
NC_006898	62161410	Anacropora_matthai	Cnidaria
NC_008161	109156542	Astrangia_sp. JVK-2006	Cnidaria
NC_008073	107736209	Briareum_asbestinum	Cnidaria
NC_008162	109156486	Colpophyllia_natans	Cnidaria
NC_008071	107736852	Discosoma_sp. CASIZ 168915	Cnidaria
NC_008072	107736879	Discosoma_sp. CASIZ 168916	Cnidaria
NC_000933	6137781	Metridium_senile	Cnidaria
NC_007224	71733173	Montastraea_annularis	Cnidaria
NC_007226	71733145	Montastraea_faveolata	Cnidaria
NC_007225	71733159	Montastraea_franksi	Cnidaria
NC_006902	62161337	Montipora_cactus	Cnidaria
NC_008163	109156458	Mussa_angulosa	Cnidaria
NC_008164	109156556	Nematostella_sp. JVK-2006	Cnidaria
NC_008165	109156514	Pavona_clavus	Cnidaria
NC_008166	109156401	Porites_porites	Cnidaria
NC_008157	109156443	Pseudopterogorgia_bipinnata	Cnidaria
NC_008158	109156528	Rhodactis_sp. CASIZ 171755	Cnidaria
NC_008159	109156415	Ricordea_florida	Cnidaria
NC_008167	109156472	Siderastrea_radians	Cnidaria
NC_007789	86990375	Acanthaster_brevispinus	Echinodermata
NC_007788	86990333	Acanthaster_planci	Echinodermata
NC_001770	5835303	Arbacia_lixula	Echinodermata
NC_006665	57854566	Asterias_amurensis	Echinodermata
NC_001627	5835079	Asterina_pectinifera	Echinodermata
NC_006666	57854641	Astropecten_polyacanthus	Echinodermata
NC_005929	49146274	Cucumaria_miniata	Echinodermata
NC_001878	5835456	Florometra_serratissima	Echinodermata
NC_007689	84488720	Gymnocrinus_richeri	Echinodermata
NC_006664	57854695	Luidia_quinalia	Echinodermata
NC_005334	41057395	Ophiopholis_aculeata	Echinodermata
NC_005930	49147332	Ophiura_lutkeni	Echinodermata
NC_001572	5834967	Paracentrotus_lividus	Echinodermata
NC_007690	84488817	Phanogenia_gracilis	Echinodermata
NC_004610	28916735	Pisaster_ochraceus	Echinodermata
NC_001453	5834897	Strongylocentrotus_purpuratus	Echinodermata
NC_006379	54310654	Urechis_caupo	Echiura
NC_001887	5835470	Balanoglossus_carnosus	Hemichordata
NC_007438	77020026	Saccoglossus_kowalevskii	Hemichordata
NC_001761	5835289	Albinaria_caerulea	Mollusca
NC_005827	45655852	Aplysia_californica	Mollusca
NC_005439	42632173	Biomphalaria_glabrata	Mollusca
NC_001816	5835415	Cepaea_nemoralis	Mollusca
NC_001276	7212445	Crassostrea_gigas	Mollusca
NC_007175	68989133	Crassostrea_virginica	Mollusca
NC_006162	51830094	Graptacme_eborea	Mollusca
NC_005940	49146557	Haliotis_rubra	Mollusca
NC_007781	86990319	Ilyanassa_obsoleta	Mollusca
NC_001636	5835093	Katharina_tunicata	Mollusca
NC_005335	41057409	Lampsilis_ornata	Mollusca
NC_002507	9790625	Loligo_bleekeri	Mollusca
NC_008098	108755543	Lophiotoma_cerithiformis	Mollusca
NC_007782	86990347	Lottia_digitalis	Mollusca
NC_006161	51830027	Mytilus_edulis	Mollusca
NC_006886	62161117	Mytilus_galloprovincialis	Mollusca
NC_007687	84488567	Mytilus_trossulus	Mollusca
NC_007980	94490665	Nautilus_macromphalus	Mollusca
NC_007896	89337413	Octopus_ocellatus	Mollusca
NC_006353	53793887	Octopus_vulgaris	Mollusca
NC_007234	71657925	Placopecten_magellanicus	Mollusca
NC_002176	7335676	Pupa_strigosa	Mollusca
NC_004321	23578034	Roboastra_europaea	Mollusca
NC_007895	89255284	Sepia_officinalis	Mollusca
NC_007894	89255407	Sepioteuthis_lessoniana	Mollusca
NC_005840	46358431	Siphonodentalium_lobatum	Mollusca
NC_006354	53793995	Todarodes_pacificus	Mollusca
NC_003354	18249923	Venerupis_(Ruditapes) philippinarum	Mollusca
NC_007893	89337394	Watasenia_scintillans	Mollusca
NC_003415	19073878	Ancylostoma_duodenale	Nematoda
NC_007934	91176175	Anisakis_simplex	Nematoda
NC_001327	5834871	Ascaris_suum	Nematoda
NC_004298	23395805	Brugia_malayi	Nematoda
NC_001328	5834884	Caenorhabditis_elegans	Nematoda
NC_004806	30725254	Cooperia_oncophora	Nematoda
NC_005305	40548800	Dirofilaria_immitis	Nematoda
NC_003416	34582511	Necator_americanus	Nematoda
NC_001861	5835443	Onchocerca_volvulus	Nematoda
NC_005941	49146518	Steinernema_carpocapsae	Nematoda
NC_008047	99878740	Strelkovimermis_spiculatus	Nematoda
NC_005143	38018138	Strongyloides_stercoralis	Nematoda
NC_008046	99878577	Thaumamermis_cosgrovei	Nematoda
NC_002681	13195735	Trichinella_spiralis	Nematoda
NC_005928	49147252	Xiphinema_americanum	Nematoda
NC_008151	108860652	Trichoplax_adhaerens	Placozoa
NC_008075	107991005	Echinococcus_granulosus	Platyhelminthes
NC_000928	7335663	Echinococcus_multilocularis	Platyhelminthes
NC_002546	10445346	Fasciola_hepatica	Platyhelminthes
NC_002767	14018028	Hymenolepis_diminuta	Platyhelminthes
NC_002354	23957831	Paragonimus_westermani	Platyhelminthes
NC_008074	107735922	Schistosoma_haematobium	Platyhelminthes
NC_002544	10445372	Schistosoma_japonicum	Platyhelminthes
NC_002545	10445333	Schistosoma_mansoni	Platyhelminthes
NC_002529	10257495	Schistosoma_mekongi	Platyhelminthes
NC_008067	107735979	Schistosoma_spindale	Platyhelminthes
NC_004826	51235018	Taenia_asiatica	Platyhelminthes
NC_002547	10445359	Taenia_crassiceps	Platyhelminthes
NC_004022	21449862	Taenia_solium	Platyhelminthes
NC_006894	62161294	Axinella_corrugata	Porifera
NC_006990	63025097	Geodia_neptuni	Porifera
NC_006991	63025140	Tethya_actinia	Porifera
